# Supplementary material for: Full capacitance potential of SWCNT electrode in ionic liquids at 4 V
Source: Royal Society of Chemistry journal article supplement (doi:10.1039/c4ta04773g), 2014-01-01
Supplement: c4ta04773g1.pdf [file c4ta04773g1.pdf]

## Supporting information

### Full capacitance potential of SWCNT electrode in ionic liquids at 4V

Yuntao Yu, Chaojie Cui, Weizhong Qian,\* and Fei Wei

Department of Chemical Engineering, Tsinghua University, Beijing 100084, PR China

#### SI-1 Single walled carbon nanotube sample and graphene sample

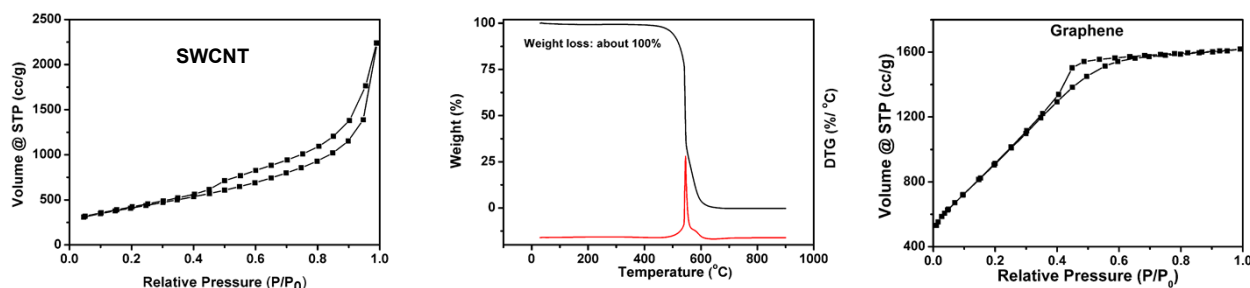

Fig.S1 Nitrogen adsorption (left) and TGA (middle) of SWCNT; Nitrogen adsorption of graphene (right).

#### SI-2 New charge mode of SCs

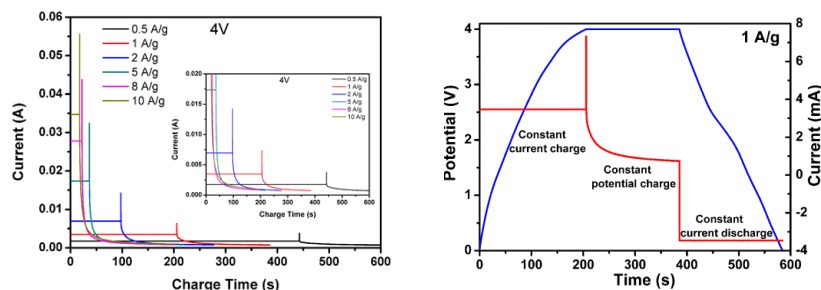

Fig.S2 Current change of SWCNT in new charge mode with different current densities.

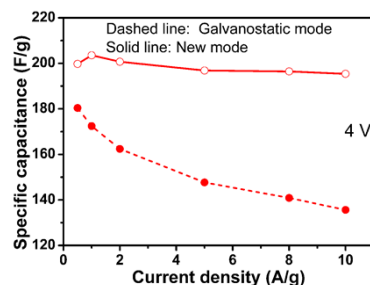

Fig.S3 Capacitance performance of graphene in different charge modes.

# 1 SI-3 Comparison of SWCNT performance in ILs electrolyte and in organic electrolyte

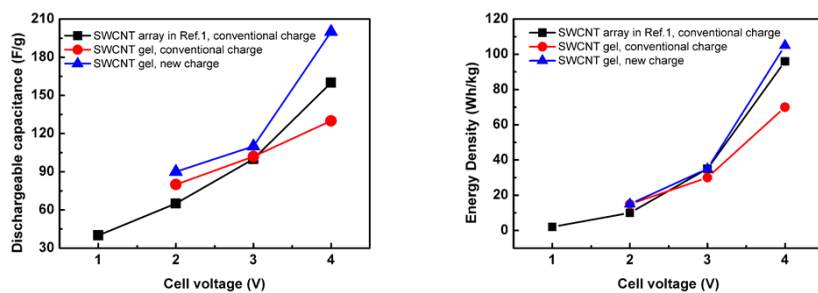

2  
3 Fig.S4 Comparison of dischargeable capacitance (left) and energy density (right) of our electrode and electrode  
4 in ref. 1h.

5
